# Supplementary material
Source: PubMed Central journal article supplement (PMC3209221)
Supplement: supp_193.22.6384_FigS1.pdf [file supp_193.22.6384_FigS1.pdf]

Supplemental Material to Yao et al., submitted to *J. Bacteriol.* 8/3/2011

**Fig. S1.** Relationship of PABLO ligation yield to rate constants for mRNA degradation. The top line is a schematic of full-length, 5'-triphosphorylated *ΔermC* mRNA or *ΔermC-del* mRNA (deletion endpoints shown by square brackets). The 5'-monophosphorylated version of these mRNAs is shown on the line below. Rate constants for various processes that contribute to the cellular amounts of *ΔermC* and *ΔermC-del* mRNAs are indicated.

Fig. S1  
Yao et al.

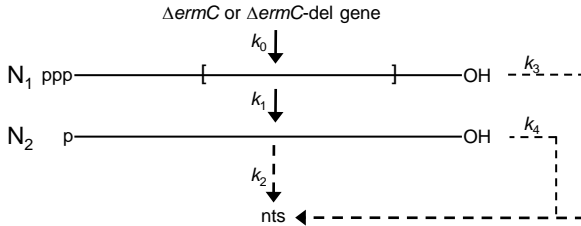

$G$  = concentration of the gene

$N_1$  = concentration of tri-P RNA

$N_2$  = concentration of mono-P RNA

$k_0$  = rate constant for transcription

$k_1$  = rate constant for conversion of  $N_1$  to  $N_2$  by a pyrophosphohydrolase

$k_2$  = rate constant for RNA degradation by the 5' exonuclease activity of RNase J1

$k_3$  = rate constant for tri-P RNA degradation by RNase Y

$k_4$  = rate constant for mono-P RNA degradation by RNase Y

The system is described by two differential equations:

$$\frac{dN_1}{dt} = k_0G - (k_1 + k_3)N_1$$

$$\frac{dN_2}{dt} = k_1N_1 - (k_2 + k_4)N_2$$

At steady state:  $\frac{dN_1}{dt} = 0$ ,  $\frac{dN_2}{dt} = 0$

and  $\frac{N_2}{N_1} = \frac{k_1}{k_2 + k_4}$

Ligation yield:  $\frac{N_2}{N_2 + N_1} = \frac{k_1}{k_1 + k_2 + k_4}$

Thus, the ligation yield is inversely related to the rate constant  $k_4$ .

Because  $k_4$  is smaller for  $\Delta ermC$ -del mRNA than for  $\Delta ermC$  mRNA, the ligation yield will be higher for  $\Delta ermC$ -del than for  $\Delta ermC$ .
